# Supplementary material for: Facile Fabrication of ZnO-ZnFe2O4 Hollow Nanostructure by a One-Needle Syringe Electrospinning Method for a High-Selective H2S Gas Sensor
Source: MDPI journal article supplement (doi:10.3390/ma15020399), 2022-01-06
Supplement: s1 [file s1]

# Facile Fabrication of ZnO-ZnFe<sub>2</sub>O<sub>4</sub> Hollow Nanostructure by a One-Needle Syringe Electrospinning Method for a High-Selective H<sub>2</sub>S Gas Sensor

Kee-Ryung Park<sup>1</sup>, Ryun Na Kim<sup>2</sup>, Yoseb Song<sup>3</sup>, Jinhyeong Kwon<sup>1\*</sup> and Hyeunseok Choi<sup>1\*</sup>

<sup>1</sup> Smart Manufacturing System R&D Department, Korea Institute of Industrial Technology (KITECH), 89 Yang-daegiro-gil, Ipjang-myeon, Seobuk-gu, Chungcheongnam-do, Cheonan, 31056, Korea

<sup>2</sup> Department of Energy Engineering, Dankook University, 119, Dandae-ro, Dongnam-gu, Cheonan-si, Chungcheongnam-do, 31116, Korea

<sup>3</sup> Korea Institute for Rare Metals, Korea Institute of Industrial Technology, 21999, Incheon, Korea

\* Correspondence: tojhs0909k@kitech.re.kr (J.K.); hchoi@kitech.re.kr (H.C.)

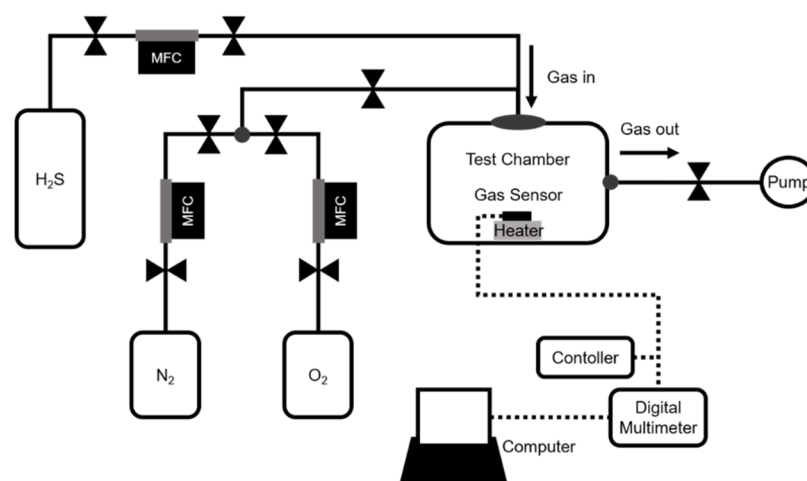

**Figure S1.** A schematic of the gas sensor measurement system.

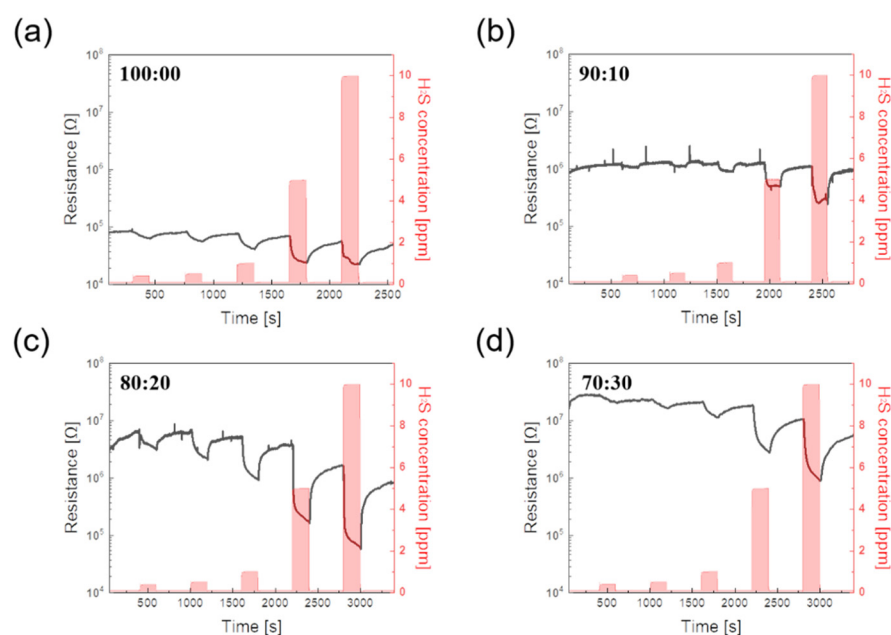

**Figure S2.** Gas sensing characteristics of ZnO-ZnFe<sub>2</sub>O<sub>4</sub> nanotubes with different precursor ratio with Zn and Fe; (a) 100:00, (b) 90:10, (c) 80:20, and (d) 70:30 to H<sub>2</sub>S gas in the range of 300 ppb – 10 ppm at 250 °C.

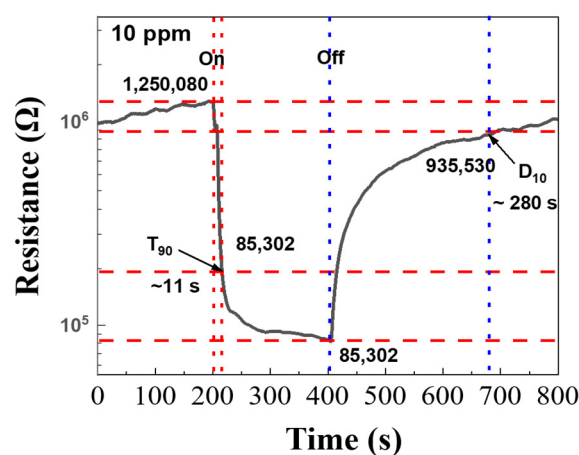

**Figure S3.** Response and recovery properties of the ZnO-ZnFe<sub>2</sub>O<sub>4</sub> hollow nanofiber under 10 ppm H<sub>2</sub>S gas at 280 °C.

**Table S1.** Selectivity data of the gas sensors fabricated with different ratios of Zn and Fe at conditions of 10 ppm of H<sub>2</sub>S gas and 250 °C.

| Ratios of Zn and Fe Precursors | Response ( $S = R_a/R_g$ ) |
|--------------------------------|----------------------------|
| 100:0                          | 4.05                       |
| 90:10                          | 4.91                       |
| 80:20                          | 84.5                       |
| 70:30                          | 30.95                      |

**Table S2.** Comparisons of the ZnFe<sub>2</sub>O<sub>4</sub> nanostructure-based H<sub>2</sub>S gas sensors.

| # | Types of the ZnFe <sub>2</sub> O <sub>4</sub> nanostructures | Concentration (ppm) | Operating Temperature (°C) | Response ( $S = R_g/R_a$ ) | Reference |
|---|--------------------------------------------------------------|---------------------|----------------------------|----------------------------|-----------|
| 1 | ZnFe <sub>2</sub> O <sub>4</sub> nanoparticle                | 10                  | 135                        | 23.3                       | [1]       |
| 2 | Cu-doped ZnFe <sub>2</sub> O <sub>4</sub> nanoparticle       | 10                  | 100                        | 18                         | [2]       |
| 3 | Au-doped ZnFe <sub>2</sub> O <sub>4</sub> microspheres       | 200                 | 25                         | 65.9                       | [3]       |
| 4 | ZnFe <sub>2</sub> O <sub>4</sub> nanoparticle                | 100                 | 260                        | 64                         | [4]       |
| 5 | ZnO-ZnFe <sub>2</sub> O <sub>4</sub> hollow nanostructure    | 10                  | 250                        | 84.5                       | This Work |

## References

1. H. Zhang, F. Meng, L. Liu, Y. Chen, P. Wang, "Highly sensitive H<sub>2</sub>S sensor based on solvothermally prepared spinel ZnFe<sub>2</sub>O<sub>4</sub> nanoparticles", *Journal of Alloys and Compounds*, 764, 147-154, 2018.
2. W. Zhang, Y. Shen, J. Zhang, H. Bi, S. Zhao, P. Zhou, C. Han, D. Wei, N. Cheng, "Low-temperature H<sub>2</sub>S sensing performance of Cu-doped ZnFe<sub>2</sub>O<sub>4</sub> nanoparticles with spinel structure", *Applied Surface Science*, 470, 581-590, 2019.
3. Y. Yan, P. Nizamidin, G. Turdi, N. Kari, A. Yimit, "Room-temperature H<sub>2</sub>S Gas Sensor Based on Au-doped ZnFe<sub>2</sub>O<sub>4</sub> Yolk-shell Microspheres", *Analytical Sciences*, 33, 945-951, 2017.
4. J. Wu, D. Gao, T. Sun, J. Bi, Y. Zhao, Z. Ning, G. Fan, Z. Xie, "Highly selective gas sensing properties of partially inversed spinel zinc ferrite towards H<sub>2</sub>S", *Sensors and Actuators B: Chemical*, 235, 258-262, 2016.
